# Supplementary material for: Novel copper fluoride analogs of cuprates
Source: Royal Society of Chemistry journal article supplement (doi:10.1039/d1cp00657f), 2021-01-01
Supplement: d1cp00657f1.pdf [file d1cp00657f1.pdf]

# Novel Copper Fluoride Analogs of Cuprates

## Supporting Materials

Nikita Rybin<sup>1</sup>, Dmitry Y. Novoselov<sup>1,2,3</sup>, Dmitry M. Korotin<sup>1,2</sup>, Vladimir I. Anisimov<sup>1,2,3</sup>, and

Artem R. Oganov<sup>1</sup>

<sup>1</sup>*Skolkovo Institute of Science and Technology, 30 Bolshoy Boulevard, bld. 1, Moscow 121205, Russia*

<sup>2</sup>*M. N. Mikheev Institute of Metal Physics of Ural Branch of Russian Academy of Sciences, 18 S. Kovalevskaya St.,  
Yekaterinburg 620137, Russia*

<sup>3</sup>*Department of Theoretical Physics and Applied Mathematics, Ural Federal University, 19 Mira St., Yekaterinburg  
620002, Russia*

Table 1: Structure of  $C2/m$ - $\text{Cu}_2\text{F}_5$  optimized using DFT (left) and DFT+U ( $U=8$  eV,  $J=0.9$  eV) (right).

| Lattice                  | Atoms | $x$  | $y$  | $z$  | Lattice                   | Atoms | $x$  | $y$  | $z$  |
|--------------------------|-------|------|------|------|---------------------------|-------|------|------|------|
| $a = 5.16$               | Cu1   | 0.50 | 0.50 | 0.50 | $a = 5.0165$              | Cu1   | 0.50 | 0.50 | 0.50 |
| $b = 5.16$               | Cu2   | 0.00 | 0.00 | 0.50 | $b = 5.0165$              | Cu2   | 0.00 | 0.00 | 0.50 |
| $c = 3.78$               | F1    | 0.19 | 0.19 | 0.27 | $c = 3.6715$              | F1    | 0.80 | 0.80 | 0.75 |
| $\alpha = 104.80$        | F2    | 0.80 | 0.80 | 0.72 | $\alpha = 106.44$         | F2    | 0.19 | 0.19 | 0.24 |
| $\beta = 104.80$         | F3    | 0.23 | 0.76 | 0.50 | $\beta = 106.44$          | F3    | 0.24 | 0.75 | 0.50 |
| $\gamma = 95.10$         | F4    | 0.76 | 0.23 | 0.50 | $\gamma = 95.07$          | F4    | 0.75 | 0.24 | 0.50 |
| $V = 93.1 \text{ \AA}^3$ | F5    | 0.50 | 0.50 | 0.00 | $V = 83.62 \text{ \AA}^3$ | F5    | 0.50 | 0.50 | 0.00 |

Table 2: Structure of  $R\bar{3}c$ -CuF<sub>3</sub> optimized using DFT (left) and DFT+U (U=8 eV, J=0.9 eV) (right).

| Lattice                  | Atoms | $x$  | $y$  | $z$  | Lattice                  | Atoms | $x$  | $y$  | $z$  |
|--------------------------|-------|------|------|------|--------------------------|-------|------|------|------|
| a = 5.30                 | Cu1   | 0.50 | 0.50 | 0.50 | a = 5.0806               | Cu1   | 0.50 | 0.50 | 0.50 |
| b = 5.30                 | Cu2   | 0.00 | 0.00 | 0.00 | b = 5.0806               | Cu2   | 0.00 | 0.00 | 0.00 |
| c = 5.30                 | F1    | 0.65 | 0.84 | 0.25 | c = 5.0806               | F1    | 0.75 | 0.10 | 0.39 |
| $\alpha = 58.2$          | F2    | 0.34 | 0.15 | 0.75 | $\alpha = 56.65^\circ$   | F2    | 0.34 | 0.15 | 0.75 |
| $\beta = 58.2$           | F3    | 0.25 | 0.65 | 0.84 | $\beta = 56.65^\circ$    | F3    | 0.10 | 0.39 | 0.75 |
| $\gamma = 58.2$          | F4    | 0.15 | 0.75 | 0.34 | $\gamma = 56.65^\circ$   | F4    | 0.60 | 0.25 | 0.89 |
| V = 100.9 Å <sup>3</sup> | F5    | 0.84 | 0.25 | 0.65 | V = 85.55 Å <sup>3</sup> | F5    | 0.39 | 0.75 | 0.10 |
|                          | F6    | 0.75 | 0.34 | 0.15 |                          | F6    | 0.89 | 0.60 | 0.25 |

Table 3: Total energy in eV per formula unit obtained by DFT.

| DFT              | $R\bar{3}c$ -CuF <sub>3</sub> | $Pnma$ -CuF <sub>3</sub> | Cu <sub>2</sub> F <sub>5</sub> | $Im\bar{3}m$ -K <sub>0.75</sub> CuF <sub>3</sub> |
|------------------|-------------------------------|--------------------------|--------------------------------|--------------------------------------------------|
| Spin-unpolarized | -14.6376                      | -14.6207                 | -26.7237                       | -155.4913                                        |
| Spin-polarized   | -14.7456                      | -14.7259                 | -26.8182                       | -155.4913                                        |

Table 4: Total energy in eV per formula unit obtained by DFT+U (U=8 eV, J=0.9 eV).

| Magnetic order | $Bmab$ -La <sub>2</sub> CuO <sub>4</sub> | Cu <sub>2</sub> F <sub>5</sub> | $Pnma$ -CuF <sub>3</sub> | $R\bar{3}c$ -CuF <sub>3</sub> |
|----------------|------------------------------------------|--------------------------------|--------------------------|-------------------------------|
| FM             | -49.4917                                 | -22.8729                       | -12.5685                 | -12.2429                      |
| AFM            | -49.7076                                 | -23.2520                       | -12.6731                 | -12.6993                      |

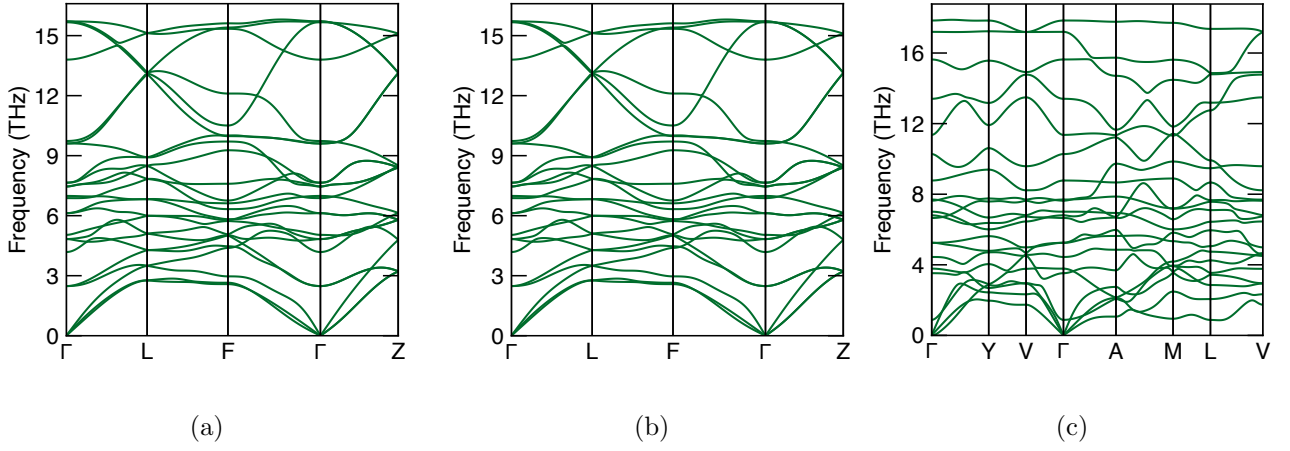

Figure 1: Phonon dispersion curves of (a)  $Pnma$ - $\text{CuF}_3$ , (b)  $R\bar{3}c$ - $\text{CuF}_3$ , and (c)  $C2/m$ - $\text{Cu}_2\text{F}_5$ . We used supercell constructed from the primitive unit cell:  $3 \times 3 \times 3$  for  $R\bar{3}c$ - $\text{CuF}_3$  and  $C2/m$ - $\text{Cu}_2\text{F}_5$ , and  $2 \times 2 \times 3$  for  $Pnma$ - $\text{CuF}_3$ .

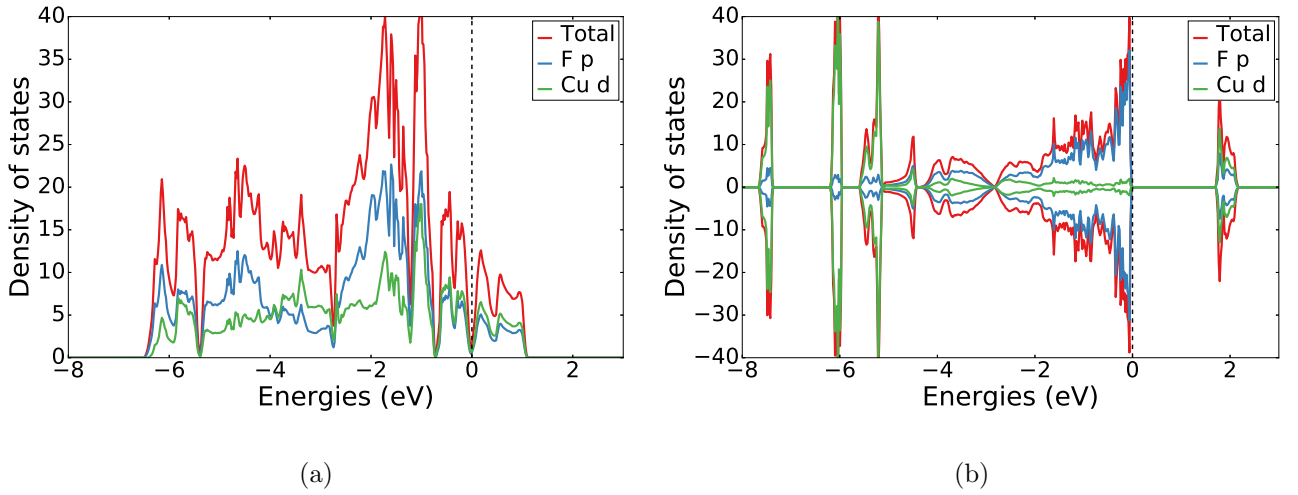

Figure 2: Density of states of  $Pnma$ - $\text{CuF}_3$  obtained using (a) DFT and (b) DFT+U ( $U=8$  eV,  $J=0.9$  eV).

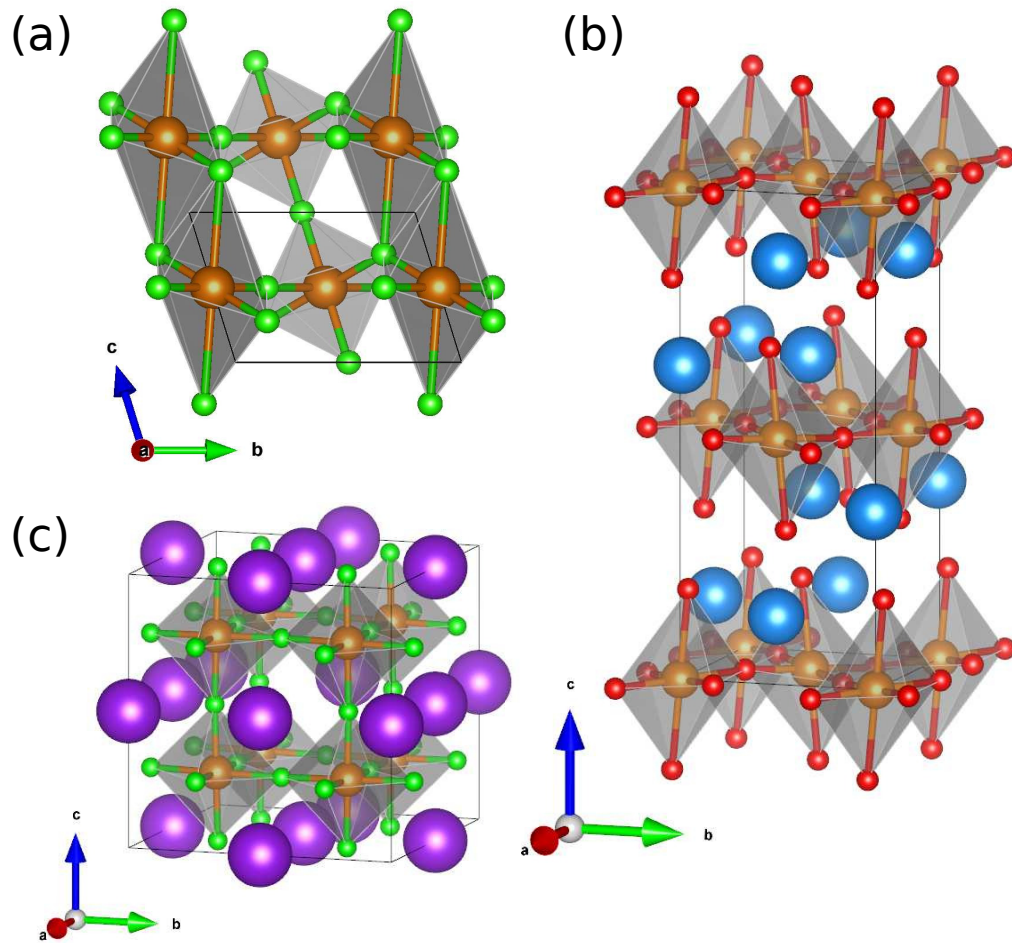

Figure 3: (color online) Schematic representation of the crystal structures: (a)  $C2/m$ - $\text{Cu}_2\text{F}_5$ , (b)  $Pmab$ - $\text{La}_2\text{CuO}_4$ , and (c)  $Im\bar{3}m$ - $\text{K}_{0.75}\text{CuF}_3$ . The Cu atom is brown, F is green, O is red, K is purple, and La is blue.
